# Supplementary material
Source: ML conference proceedings conference paper supplement (https://openaccess.thecvf.com/content/CVPR_2019/html/Kanehira_Learning_to_Explain_CVPR_2019_paper.html)
Supplement: Supplementary file 1 [file Kanehira_Learning_to_Explain_CVPR_2019_supplemental.pdf]

# Learning to Explain with Complementary Examples (supplementary material)

## 1. Output Examples

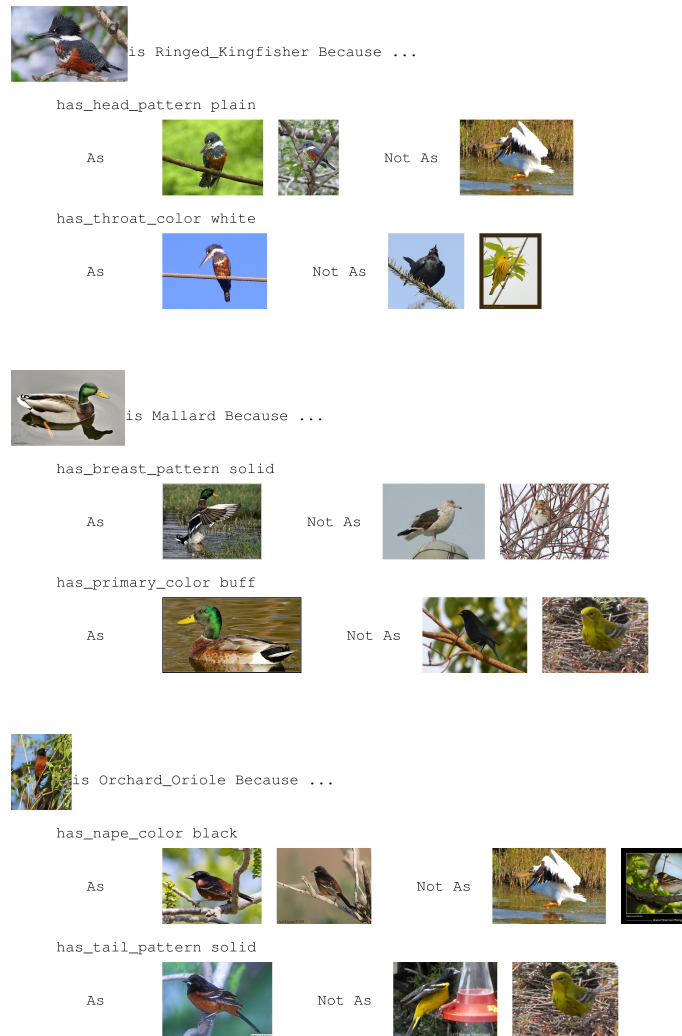

Figure 1. Output Examples on CUB dataset.
